# Supplementary material
Source: Springer Nature journal article supplement (https://www.springermedizin.de/resource/supplementary/12958_2013_1151_MOESM6_ESM.pdf/9566920)

**A**

Absorbance (450 nm)

12 h

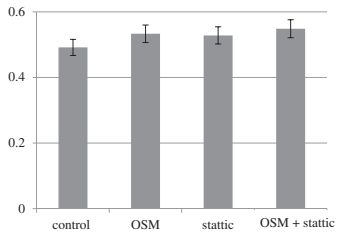**B**

Absorbance (450 nm)

48 h

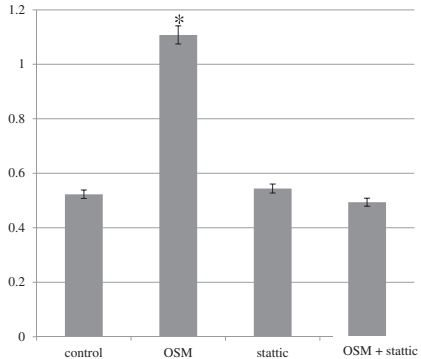

Supplement: MOESM6 [file 9566920]
